# Supplementary material for: Crosstalk between Wnt/β-Catenin and Estrogen Receptor Signaling Synergistically Promotes Osteogenic Differentiation of Mesenchymal Progenitor Cells
Source: PLoS One. 2013 Dec 5;8(12):e82436. doi: 10.1371/journal.pone.0082436 (PMC3855436; doi:10.1371/journal.pone.0082436)
Supplement: Table S1 — Oligonucleotides for cloning and RT-PCR. (XLS) [file pone.0082436.s001.xls]

## Sheet: Suppl Table 1
Table S1. Oligonucleotides for cloning and RT-PCR
Gene	Species	Accession No	Primer Sequence	Use
Wnt3A	mouse	NM_009522	CCCAAGCTTACCACCATGGCTCCTCTCGGATACCTCTTAG	cloning
			CGCGGATCCCTACTTGCAGGTGTGCACGTCATAG
ER1	human	NM_000125	AGGGGATCCACCATGGGCATGACCATGACCCTCCACACCAAAGC	cloning
			CCGCTCGAGTCAGACCGTGGCAGGGAAACCCTC
ER1	mouse	NM_007956	AAGGGCAGTCACAATGAACC	RT-PCR
			GCCAGGTCATTCTCCACATT
ER2	mouse		GAAGCTGGCTGACAAGGAAC	RT-PCR
			AACGAGGTCTGGAGCAAAGA
aromatase	mouse		CTTTCAGCCTTTTGGCTTTG	RT-PCR
			ATTTCCACAAGGTGCCTGTC
Hsd17b4	mouse		TCACCAAACCGTACCAGTCA	RT-PCR
			GGCAAACAGGAGAAGTCAGC
GAPDH	mouse	NM_008084	ACCCAGAAGACTGTGGATGG	RT-PCR
			CACATTGGGGGTAGGAACAC
